# Supplementary material for: Advanced treatment of hydrothermal liquefaction wastewater with nanofiltration to recover carboxylic acids
Source: Royal Society of Chemistry journal article supplement (doi:10.1039/c8ew00007g), 2018-01-01
Supplement: c8ew00007g1.pdf [file c8ew00007g1.pdf]

**Advanced treatment of hydrothermal liquefaction wastewater with  
nanofiltration to recover carboxylic acids**

Xuesong Zhang\*, John Scott, Brajendra K. Sharma, and Nandakishore Rajagopalan\*

**Supplementary**

**Table S1** Mass balance during NF of acidic or as-is model HTL-WW-01 solution.

|                  | Mass         | Conductivity | DOC  | DOC         |
|------------------|--------------|--------------|------|-------------|
|                  | g            | mS/cm        | mg/L | mg          |
| Feed             | 200.8        | 1.44         | 5019 | 1007.8      |
| Permeate         | 60.5         | 1.22         | 4153 | 252.3       |
| Retentate        | 140.4        | 1.52         | 5239 | 735.6       |
| Mass Balance (%) | <b>-0.05</b> | -            | -    | <b>1.98</b> |

**Table S2** Mass balance during NF of acidic or as-is model HTL-WW-02 solution.

|                  | Mass         | Conductivity | DOC  | DOC          |
|------------------|--------------|--------------|------|--------------|
|                  | g            | mS/cm        | mg/L | mg           |
| Feed             | 201.0        | 1.45         | 5535 | 1112.5       |
| Permeate         | 60.8         | 1.27         | 5126 | 311.7        |
| Retentate        | 140.8        | 1.49         | 5950 | 837.8        |
| Mass Balance (%) | <b>-0.29</b> | -            | -    | <b>-3.32</b> |

**Table S3** Mass balance during NF of acidic or as-is model HTL-WW-03 solution.

|                  | Mass         | Conductivity | DOC  | DOC          |
|------------------|--------------|--------------|------|--------------|
|                  | g            | mS/cm        | mg/L | mg           |
| Feed             | 200.5        | 1.45         | 5433 | 1089.3       |
| Permeate         | 60.7         | 1.25         | 5046 | 306.3        |
| Retentate        | 140.3        | 1.50         | 5798 | 813.5        |
| Mass Balance (%) | <b>-0.25</b> | -            | -    | <b>-2.80</b> |

**Table S4** Mass balance during NF of acidic or as-is model HTL-WW-04 solution.

|                  | Mass         | Conductivity | DOC  | DOC         |
|------------------|--------------|--------------|------|-------------|
|                  | g            | mS/cm        | mg/L | mg          |
| Feed             | 201.8        | 1.19         | 5718 | 1153.9      |
| Permeate         | 60.7         | 0.95         | 4974 | 301.9       |
| Retentate        | 141.8        | 1.28         | 5977 | 847.5       |
| Mass Balance (%) | <b>-0.35</b> | -            | -    | <b>0.39</b> |

**Table S5** Mass balance during NF of pH 8 model HTL-WW-01 solution.

|                  | Mass         | Conductivity | DOC  | DOC         | Alkalinity <sup>a</sup> | Alkalinity   |
|------------------|--------------|--------------|------|-------------|-------------------------|--------------|
|                  | g            | mS/cm        | mg/L | mg          | g/L                     | g            |
| Feed             | 203.5        | 9.78         | 4769 | 970.5       | 5.47                    | 1.11         |
| Permeate         | 62.8         | 2.23         | 833  | 52.3        | 1.33                    | 0.08         |
| Retentate        | 140.8        | 12.06        | 6154 | 866.5       | 7.37                    | 1.04         |
| Mass Balance (%) | <b>-0.05</b> | -            | -    | <b>5.33</b> | -                       | <b>-0.90</b> |

<sup>a</sup> Alkalinity (g/L) is defined as the amount of acid required to obtain a methyl orange end-point expressed in terms of acetate

**Table S6** Mass balance during NF of pH 8 model HTL-WW-02 solution.

|                  | Mass        | Conductivity | DOC  | DOC         | Alkalinity <sup>a</sup> | Alkalinity  |
|------------------|-------------|--------------|------|-------------|-------------------------|-------------|
|                  | g           | mS/cm        | mg/L | mg          | g/L                     | g           |
| Feed             | 204.5       | 9.60         | 5421 | 1108.6      | 5.85                    | 1.20        |
| Permeate         | 68.0        | 1.99         | 1308 | 88.9        | 1.15                    | 0.08        |
| Retentate        | 135.6       | 12.96        | 7117 | 965.0       | 7.97                    | 1.08        |
| Mass Balance (%) | <b>0.44</b> | -            | -    | <b>4.93</b> | -                       | <b>3.33</b> |

<sup>a</sup> Alkalinity (g/L) is defined as the amount of acid required to obtain a methyl orange end-point expressed in terms of acetate

**Table S7** Mass balance during NF of pH 8 model HTL-WW-03 solution.

|                  | Mass        | Conductivity | DOC  | DOC         | Alkalinity <sup>a</sup> | Alkalinity  |
|------------------|-------------|--------------|------|-------------|-------------------------|-------------|
|                  | g           | mS/cm        | mg/L | mg          | g/L                     | g           |
| Feed             | 204.4       | 9.46         | 5288 | 1080.9      | 5.75                    | 1.18        |
| Permeate         | 63.3        | 2.09         | 1386 | 87.7        | 1.30                    | 0.08        |
| Retentate        | 141.1       | 12.11        | 7130 | 1006        | 7.58                    | 1.07        |
| Mass Balance (%) | <b>0.00</b> | -            | -    | <b>1.19</b> | -                       | <b>2.54</b> |

<sup>a</sup> Alkalinity (g/L) is defined as the amount of acid required to obtain a methyl orange end-point expressed in terms of acetate

**Table S8** Mass balance during NF of pH 8 model HTL-WW-04 solution.

|                  | Mass        | Conductivity | DOC  | DOC         | Alkalinity <sup>a</sup> | Alkalinity  |
|------------------|-------------|--------------|------|-------------|-------------------------|-------------|
|                  | g           | mS/cm        | mg/L | mg          | g/L                     | g           |
| Feed             | 204.4       | 9.31         | 5229 | 1068.8      | 6.14                    | 1.26        |
| Permeate         | 61.6        | 2.18         | 1416 | 87.2        | 1.86                    | 0.12        |
| Retentate        | 142.6       | 11.99        | 6819 | 972.4       | 8.23                    | 1.17        |
| Mass Balance (%) | <b>0.10</b> | -            | -    | <b>0.86</b> | -                       | <b>2.38</b> |

<sup>a</sup> Alkalinity (g/L) is defined as the amount of acid required to obtain a methyl orange end-point expressed in terms of acetate



**Table S9** Mass balance during NF of pH 9 model HTL-WW-02 solution.

|                  | Mass        | Conductivity | DOC  | DOC         | Alkalinity <sup>a</sup> | Alkalinity  |
|------------------|-------------|--------------|------|-------------|-------------------------|-------------|
|                  | g           | mS/cm        | mg/L | mg          | g/L                     | g           |
| Feed             | 201.2       | 10.27        | 5462 | 1099.0      | 5.55                    | 1.12        |
| Permeate         | 63.6        | 1.70         | 1237 | 78.7        | 0.86                    | 0.06        |
| Retentate        | 137.2       | 13.60        | 7257 | 995.6       | 7.76                    | 1.07        |
| Mass Balance (%) | <b>0.20</b> | -            | -    | <b>2.25</b> | -                       | <b>0.89</b> |

<sup>a</sup> Alkalinity (g/L) is defined as the amount of acid required to obtain a methyl orange end-point expressed in terms of acetate

**Table S10** Mass balance during NF of pH 10 model HTL-WW-02 solution.

|                  | Mass        | Conductivity | DOC  | DOC         | Alkalinity <sup>a</sup> | Alkalinity   |
|------------------|-------------|--------------|------|-------------|-------------------------|--------------|
|                  | g           | mS/cm        | mg/L | mg          | g/L                     | g            |
| Feed             | 202.6       | 10.39        | 5361 | 1086.0      | 5.43                    | 1.10         |
| Permeate         | 64.9        | 1.93         | 1190 | 77.2        | 1.00                    | 0.07         |
| Retentate        | 136.9       | 13.62        | 7234 | 990.3       | 7.71                    | 1.06         |
| Mass Balance (%) | <b>0.39</b> | -            | -    | <b>1.70</b> | -                       | <b>-2.73</b> |

<sup>a</sup> Alkalinity (g/L) is defined as the amount of acid required to obtain a methyl orange end-point expressed in terms of acetate

**Table S11** Charges on the membrane and the state of solutes in the synthetic HTL-WW solutions.

| pH  | Membrane charge | Acetic acid            | Lactic acid            | Propionic acid         | Isobutyric acid        | Phenol               | Butanone  | Pyridine               |
|-----|-----------------|------------------------|------------------------|------------------------|------------------------|----------------------|-----------|------------------------|
|     |                 | pK <sub>a</sub> (4.75) | pK <sub>a</sub> (3.86) | pK <sub>a</sub> (4.88) | pK <sub>a</sub> (4.84) | pK <sub>a</sub> (10) |           | pK <sub>a</sub> (5.25) |
| 2.6 | +               | unionized              | unionized              | unionized              | unionized              | unionized            | unionized | +                      |
| 8   | -               | ionized                | ionized                | ionized                | ionized                | unionized            | unionized | unionized              |

## Figure Captions

**Fig. S1** UV-Vis spectra of raw model HTL-WW solutions separated by the NF90 membrane after dilution 1:100 in DI water: HTL-WW-01 (A); HTL-WW-02 (B); HTL-WW-03 (C); HTL-WW-04 (D).

**Fig. S2** UV-Vis spectra of pH 8 model HTL-WW solutions separated by the NF90 membrane after dilution 1:100 in DI water: HTL-WW-01 (A); HTL-WW-02 (B); HTL-WW-03 (C); HTL-WW-04 (D).

**Fig. S3** UV-Vis spectra of HTL-WW-02 solutions separated by the NF90 membrane with respect to pH adjustment after dilution 1:100 in DI water: initial pH (A); pH 8 (B); pH 9 (C); and pH 10 (D).

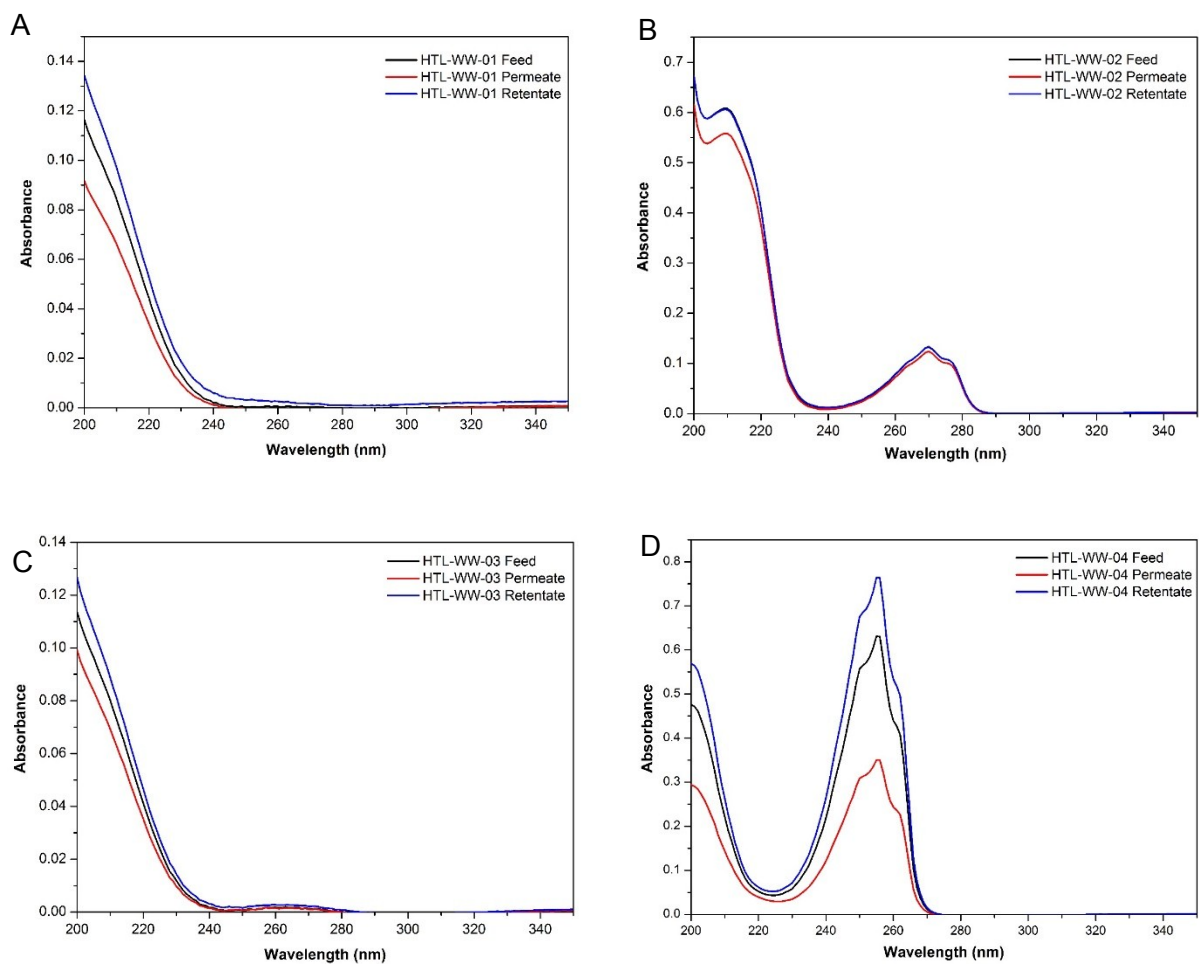

**Fig. S1** UV-Vis spectra of raw model HTL-WW solutions (pH  $\sim$ 2.6) separated by the NF90 membrane after dilution 1:100 in DI water: HTL-WW-01 (A); HTL-WW-02 (B); HTL-WW-03 (C); HTL-WW-04 (D).

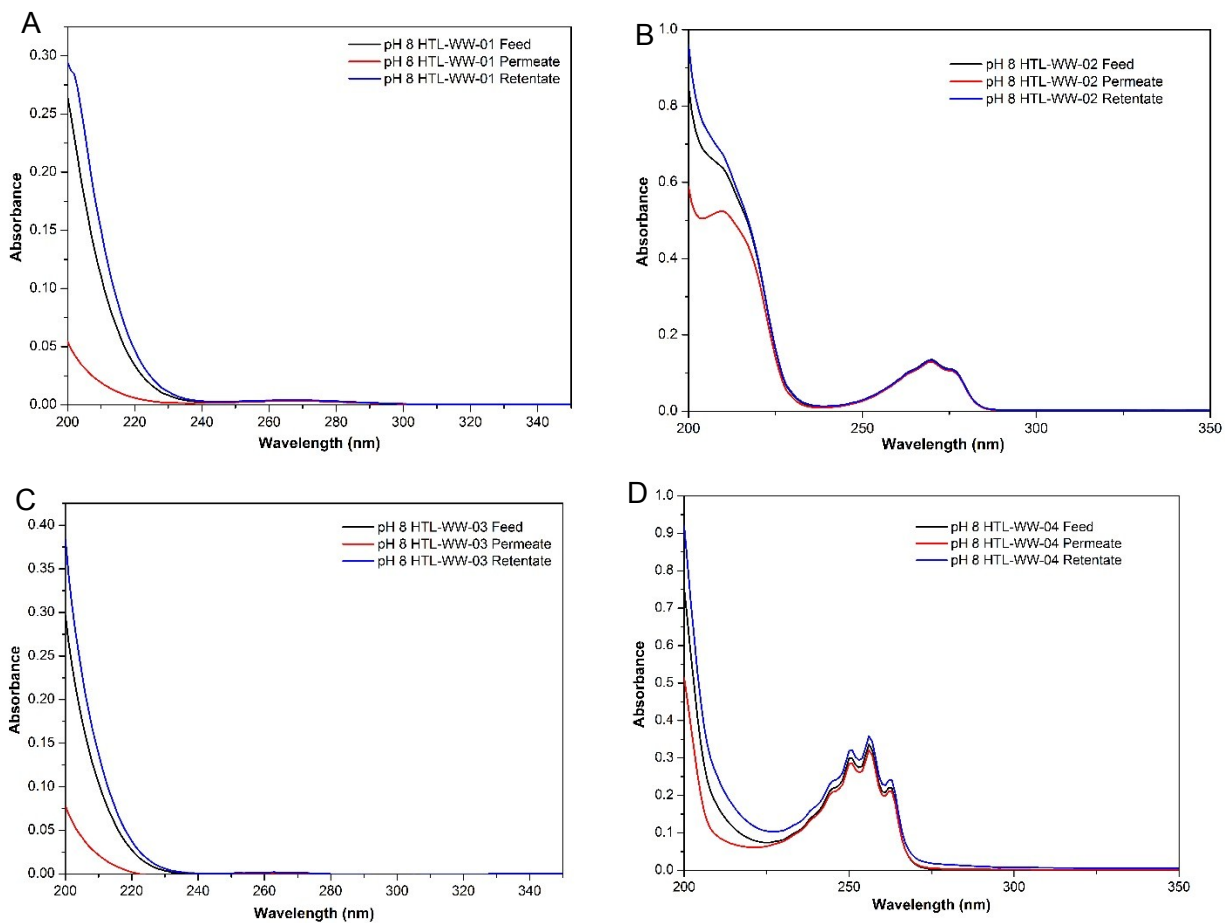

**Fig. S2** UV-Vis spectra of pH 8 model HTL-WW solutions separated by the NF90 membrane after dilution 1:100 in DI water: HTL-WW-01 (A); HTL-WW-02 (B); HTL-WW-03 (C); HTL-WW-04 (D).

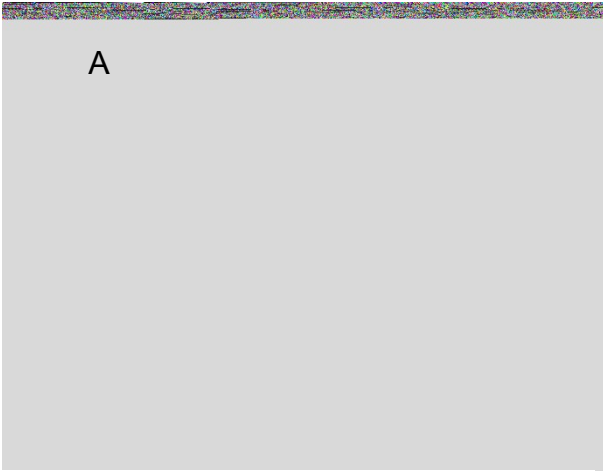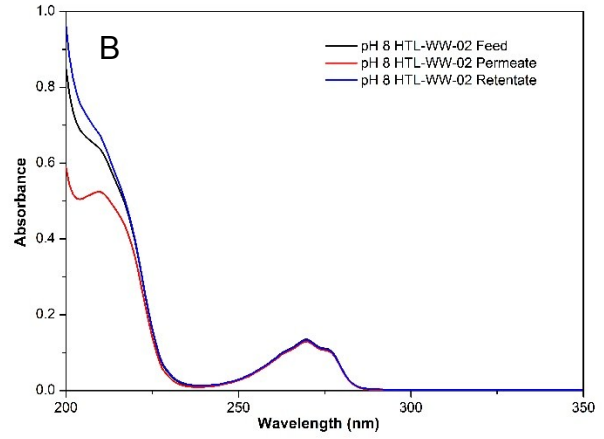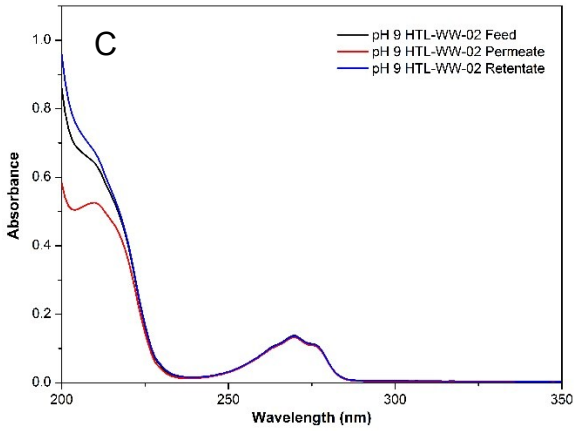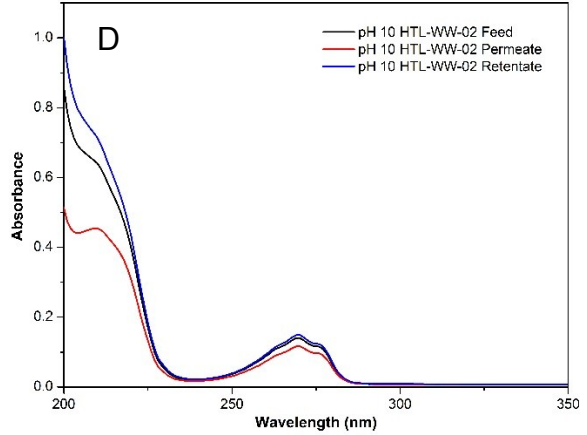

**Fig. S3** UV-Vis spectra of HTL-WW-02 solutions separated by the NF90 membrane with respect to pH adjustment after dilution 1:100 in DI water: initial pH 2.4 (A); pH 8 (B); pH 9 (C); and pH 10 (D).
